# Supplementary material for: Heavy-load exercise in older adults activates vasculogenesis and has a stronger impact on muscle gene expression than in young adults
Source: PubMed Central journal article supplement (PMC9526277; doi:10.1186/s11556-022-00304-1), 2022-10-01
Supplement: 11556_2022_304_MOESM1_ESM.pdf [file 11556_2022_304_MOESM1_ESM.pdf]

SUPPLEMENTARY

Heavy-load exercise in older adults activates vasculogenesis and has a stronger impact on muscle gene expression than in young adults

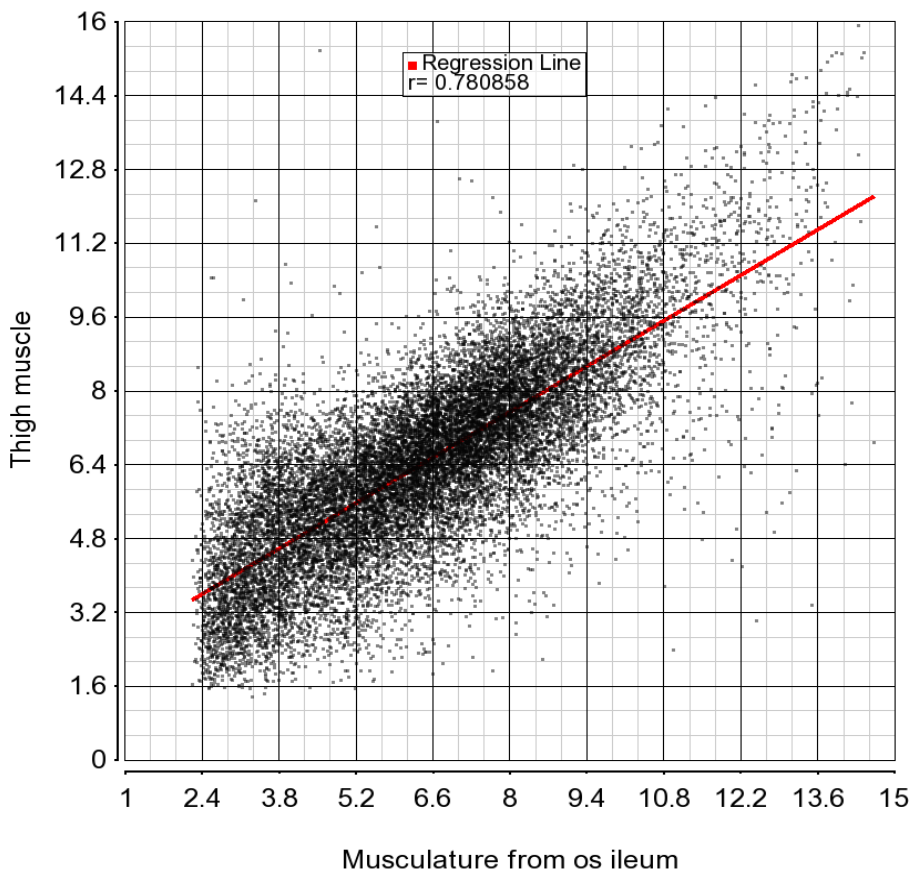

**Figure S1. Comparison of transcript signal levels between os ileum–associated muscle and thigh muscle.** Numbers on the axes represent  $\log_2$  transformed signal levels. For technical reasons, it was possible to use 17,652 transcripts or 93.5% in further statistical analysis, which is presented in the scatterplot.

| Gene symbol | Elderly | Young      |
|-------------|---------|------------|
| COL4A1      | Red     | Dark Red   |
| EDNRB       | Red     | Dark Red   |
| SPARC       | Red     | Dark Red   |
| COL1A1      | Red     | Dark Red   |
| ENPP2       | Red     | Dark Red   |
| COL1A2      | Red     | Dark Red   |
| NQO1        | Red     | Dark Red   |
| IGF1        | Red     | Dark Red   |
| IGFBP5      | Red     | Dark Red   |
| LOX         | Red     | Dark Red   |
| JAM2        | Red     | Dark Red   |
| SMOC2       | Red     | Dark Red   |
| COL15A1     | Red     | Dark Red   |
| PRCP        | Red     | Dark Red   |
| THY1        | Red     | Dark Red   |
| CAV1        | Red     | Dark Red   |
| COL4A2      | Red     | Dark Red   |
| TNFSF10     | Red     | Dark Red   |
| KDR         | Red     | Dark Red   |
| MMP2        | Red     | Dark Red   |
| EDNRA       | Red     | Dark Red   |
| HSPG2       | Red     | Dark Red   |
| SNAI2       | Red     | Dark Red   |
| IFI16       | Red     | Dark Red   |
| F2R         | Red     | Dark Red   |
| SEMA6A      | Red     | Dark Red   |
| RHOJ        | Red     | Dark Red   |
| FZD4        | Red     | Dark Red   |
| CDH5        | Red     | Dark Red   |
| CD34        | Red     | Dark Red   |
| HEY1        | Red     | Dark Red   |
| AKT3        | Red     | Dark Red   |
| AHR         | Red     | Dark Red   |
| PDGFRB      | Red     | Dark Red   |
| F11R        | Red     | Dark Red   |
| IGFBP7      | Red     | Dark Red   |
| SULF2       | Red     | Dark Red   |
| RECK        | Red     | Dark Red   |
| SEMA5A      | Red     | Dark Red   |
| HTRA1       | Red     | Dark Red   |
| NOTCH4      | Red     | Dark Red   |
| LRPAP1      | Green   | Dark Green |
| NQO2        | Green   | Dark Green |
| DYSF        | Green   | Dark Green |
| LRRFIP1     | Green   | Dark Green |
| QKI         | Green   | Dark Green |
| KCNMA1      | Green   | Dark Green |
| CAMK2A      | Green   | Dark Green |
| HIPK2       | Green   | Dark Green |
| PROX1       | Green   | Dark Green |
| CCR3        | Green   | Dark Green |
| TUBA4A      | Green   | Dark Green |

**Figure S2.** Genes within the Diseases and Function category Vasculogenesis with increased (red) or reduced (green) expression end vs start of the training period in elderly as compared to young.

| Gene Symbol |                                                                       | Oslo cohort                 |                         |                        | BSU cohort                  |                         |                        |
|-------------|-----------------------------------------------------------------------|-----------------------------|-------------------------|------------------------|-----------------------------|-------------------------|------------------------|
| Gene Title  |                                                                       | Fold-Change (End vs. Start) | p-value (End vs. Start) | Qvalue (End vs. Start) | Fold-Change (End vs. Start) | p-value (End vs. Start) | Qvalue (End vs. Start) |
| ABC1        | ATP-binding cassette, sub-family G (WHITE), member 1                  | 1.11                        | 6.0E-04                 | 4.0E-02                | 1.16                        | 2.00E-02                | 8.14E-02               |
| ACSS1       | acyl-CoA synthetase short-chain family member 1                       | -1.12                       | 2.8E-03                 | 8.4E-02                | -1.25                       | 1.41E-02                | 6.91E-02               |
| ACSS2       | acyl-CoA synthetase short-chain family member 2                       | -1.12                       | 2.3E-04                 | 2.9E-02                | -1.18                       | 1.61E-04                | 8.02E-03               |
| ACTN2       | actinin, alpha 2                                                      | -1.09                       | 1.7E-05                 | 1.1E-02                | -1.10                       | 2.34E-03                | 2.92E-02               |
| ADPRHL1     | ADP-ribosylhydrolase like 1                                           | -1.16                       | 4.2E-05                 | 1.4E-02                | -1.18                       | 4.25E-03                | 3.84E-02               |
| AHR         | aryl hydrocarbon receptor                                             | 1.11                        | 1.8E-03                 | 6.4E-02                | 1.37                        | 1.08E-04                | 6.71E-03               |
| AKT3        | v-akt murine thymoma viral oncogene homolog 3                         | -1.12                       | 2.8E-03                 | 8.4E-02                | 1.23                        | 2.24E-03                | 2.85E-02               |
| ALPK3       | alpha-kinase 3                                                        | -1.16                       | 4.5E-04                 | 3.6E-02                | -1.31                       | 6.68E-02                | 1.56E-02               |
| ALYREF      | Aly/REF export factor                                                 | -1.09                       | 3.9E-04                 | 3.5E-02                | -1.21                       | 2.32E-03                | 2.91E-02               |
| ANK1        | ankyrin 1, erythrocytic                                               | -1.08                       | 2.0E-03                 | 6.8E-02                | -1.25                       | 5.13E-03                | 4.23E-02               |
| ANKRD2      | ankyrin repeat domain 2 (stretch responsive muscle)                   | -1.47                       | 6.3E-04                 | 4.0E-02                | -1.82                       | 6.65E-04                | 1.55E-02               |
| ANXA11      | annexin A11                                                           | -1.10                       | 1.2E-03                 | 5.4E-02                | -1.14                       | 6.56E-03                | 4.81E-02               |
| AP1B1       | adaptor-related protein complex 1, beta 1 subunit                     | -1.06                       | 8.0E-04                 | 4.4E-02                | -1.12                       | 1.05E-02                | 6.01E-02               |
| APRT        | adenine phosphoribosyltransferase                                     | -1.08                       | 4.3E-04                 | 3.6E-02                | -1.11                       | 1.30E-02                | 6.65E-02               |
| ASPN        | asporin                                                               | 1.17                        | 1.0E-04                 | 2.1E-02                | 1.92                        | 2.25E-03                | 2.86E-02               |
| AVPR1A      | arginine vasopressin receptor 1A                                      | 1.14                        | 5.7E-05                 | 1.6E-02                | 1.76                        | 1.15E-04                | 6.94E-03               |
| B3GALT1     | beta 1,3-galactosyltransferase-like                                   | 1.14                        | 1.3E-03                 | 5.7E-02                | 1.34                        | 4.77E-04                | 1.34E-02               |
| BACE2       | beta-site APP-cleaving enzyme 2                                       | 1.08                        | 2.1E-03                 | 7.0E-02                | 1.38                        | 3.29E-04                | 1.15E-02               |
| BNIP3L      | BCL2/adenovirus E1B 19kDa interacting protein 3-like                  | 1.08                        | 3.7E-03                 | 9.5E-02                | 1.15                        | 2.79E-02                | 9.49E-02               |
| BOPI1       | block of proliferation 1 /// microRNA 7112                            | -1.06                       | 1.1E-03                 | 5.2E-02                | -1.22                       | 9.31E-04                | 1.86E-02               |
| C20orf166   | chromosome 20 open reading frame 166                                  | -1.21                       | 5.4E-05                 | 1.6E-02                | -1.13                       | 5.06E-03                | 4.21E-02               |
| CAMK2A      | calcium/calmodulin-dependent protein kinase II alpha                  | -1.14                       | 6.4E-04                 | 4.0E-02                | -1.20                       | 3.88E-03                | 3.67E-02               |
| CAMK2B      | calcium/calmodulin-dependent protein kinase II beta                   | -1.11                       | 9.2E-05                 | 1.9E-02                | -1.23                       | 5.12E-04                | 1.38E-02               |
| CANP6       | calpain 6                                                             | 1.19                        | 3.5E-03                 | 9.3E-02                | 1.64                        | 1.05E-03                | 1.98E-02               |
| CARM1       | coactivator-associated arginine methyltransferase 1                   | -1.07                       | 3.7E-03                 | 9.7E-02                | -1.12                       | 2.53E-02                | 9.04E-02               |
| CASP4       | caspase 4, apoptotic-related cysteine peptidase                       | 1.14                        | 1.5E-03                 | 6.2E-02                | 1.38                        | 1.18E-02                | 6.36E-02               |
| CAV1        | caveolin 1, caveolae protein, 22kDa                                   | 1.16                        | 3.7E-04                 | 3.5E-02                | 1.33                        | 1.50E-05                | 2.74E-03               |
| CCR3        | chemokine (C-C motif) receptor 3                                      | -1.25                       | 2.4E-04                 | 2.9E-02                | -1.43                       | 4.26E-03                | 3.84E-02               |
| CD34        | CD34 molecule                                                         | 1.12                        | 2.6E-03                 | 8.0E-02                | 1.35                        | 3.48E-06                | 1.51E-03               |
| CD93        | CD93 molecule                                                         | 1.12                        | 2.2E-03                 | 7.2E-02                | 1.70                        | 5.54E-08                | 1.77E-04               |
| CD42EP4     | CD42 effector protein (Rho GTPase binding) 4                          | -1.07                       | 2.0E-03                 | 6.8E-02                | -1.18                       | 1.10E-02                | 6.13E-02               |
| CDH5        | cadherin 5, type 2 (vascular endothelium)                             | 1.12                        | 1.7E-03                 | 6.3E-02                | 1.58                        | 9.52E-07                | 8.66E-04               |
| CDH6        | cadherin 6, type 2, K-cadherin (fetal kidney)                         | 1.11                        | 2.2E-03                 | 7.1E-02                | 1.62                        | 2.63E-05                | 3.57E-03               |
| CEP57       | centrosomal protein 57kDa                                             | 1.10                        | 5.2E-04                 | 3.8E-02                | 1.19                        | 2.22E-02                | 8.52E-02               |
| CHRD1L      | chordin-like 1                                                        | 1.19                        | 1.2E-03                 | 5.3E-02                | 1.39                        | 1.45E-02                | 7.01E-02               |
| CLEC14A     | C-type lectin domain family 14, member A                              | 1.08                        | 2.0E-03                 | 6.8E-02                | 1.29                        | 2.06E-04                | 9.20E-03               |
| CLEC2D      | C-type lectin domain family 2, member D                               | 1.10                        | 1.4E-03                 | 5.7E-02                | 1.42                        | 1.43E-02                | 6.96E-02               |
| CLTCL1      | clathrin, heavy chain-like 1                                          | -1.10                       | 1.9E-03                 | 6.6E-02                | -1.24                       | 6.31E-05                | 5.24E-03               |
| CMIP        | c-Maf inducing protein                                                | 1.09                        | 1.8E-03                 | 6.4E-02                | 1.27                        | 2.61E-02                | 9.17E-02               |
| CNNM4       | cyclin M4                                                             | -1.18                       | 5.8E-05                 | 1.6E-02                | -1.24                       | 9.63E-05                | 6.37E-03               |
| COL15A1     | collagen, type XV, alpha 1                                            | 1.17                        | 3.4E-05                 | 1.2E-02                | 1.40                        | 3.67E-04                | 1.20E-02               |
| COL1A1      | collagen, type I, alpha 1                                             | 1.33                        | 3.6E-03                 | 9.5E-02                | 1.94                        | 5.61E-04                | 1.44E-02               |
| COL1A2      | collagen, type I, alpha 2                                             | 1.26                        | 1.1E-03                 | 5.1E-02                | 1.57                        | 3.39E-04                | 1.16E-02               |
| COL3A1      | collagen, type III, alpha 1                                           | 1.35                        | 6.2E-04                 | 4.0E-02                | 1.69                        | 3.30E-05                | 4.02E-03               |
| COL4A1      | collagen, type IV, alpha 1                                            | 1.18                        | 6.3E-05                 | 1.6E-02                | 2.45                        | 5.72E-08                | 1.77E-04               |
| COL4A2      | collagen, type IV, alpha 2                                            | 1.16                        | 2.0E-05                 | 1.1E-02                | 2.31                        | 6.02E-07                | 6.76E-04               |
| COL5A2      | collagen, type V, alpha 2                                             | 1.18                        | 3.6E-03                 | 9.4E-02                | 1.87                        | 1.38E-03                | 2.22E-02               |
| COL6A3      | collagen, type VI, alpha 3                                            | 1.17                        | 2.8E-03                 | 8.4E-02                | 1.24                        | 3.28E-03                | 3.43E-02               |
| COLEC12     | collectin sub-family member 12                                        | 1.18                        | 2.2E-05                 | 1.1E-02                | 1.30                        | 2.62E-03                | 3.07E-02               |
| CSGALNACT1  | chondroitin sulfate N-acetylgalactosaminyltransferase 1               | 1.12                        | 2.5E-03                 | 7.8E-02                | 1.60                        | 8.58E-05                | 6.06E-03               |
| CTSK        | cathepsin K                                                           | 1.17                        | 2.5E-03                 | 7.8E-02                | 1.32                        | 1.41E-02                | 6.91E-02               |
| CTSO        | cathepsin O                                                           | 1.12                        | 6.2E-04                 | 4.0E-02                | 1.23                        | 2.26E-02                | 8.60E-02               |
| CYB5D2      | cytochrome b5 domain containing 2                                     | 1.07                        | 1.0E-03                 | 5.0E-02                | 1.13                        | 4.10E-03                | 3.77E-02               |
| CYP4B1      | cytochrome P450, family 4, subfamily B, polypeptide 1                 | -1.24                       | 1.6E-05                 | 1.1E-02                | -1.67                       | 6.94E-05                | 5.45E-03               |
| DCAF15      | DCB1 and CUL4 associated factor 15                                    | -1.07                       | 5.0E-04                 | 3.8E-02                | -1.22                       | 6.26E-03                | 4.70E-02               |
| DCUN1D1     | DCN1, defective in cullin neddylation 1, domain containing 1          | 1.13                        | 3.3E-03                 | 9.2E-02                | 1.29                        | 3.74E-03                | 3.61E-02               |
| DGKD        | diacylglycerol kinase, delta 130kDa                                   | -1.12                       | 4.3E-04                 | 3.6E-02                | -1.18                       | 1.43E-04                | 7.54E-03               |
| DHCR24      | 24-dehydrocholesterol reductase                                       | -1.19                       | 2.3E-03                 | 7.3E-02                | -1.38                       | 3.03E-04                | 1.10E-02               |
| DHFR        | dihydrofolate reductase                                               | 1.10                        | 1.4E-03                 | 5.9E-02                | 1.29                        | 3.64E-04                | 1.20E-02               |
| DHRS7B      | dehydrogenase/reductase (SDR family) member 7B                        | -1.09                       | 4.4E-04                 | 3.6E-02                | -1.19                       | 1.29E-03                | 2.16E-02               |
| DNAI85      | DnaJ (Hsp40) homolog, subfamily B, member 5                           | -1.14                       | 7.0E-04                 | 4.1E-02                | -1.21                       | 2.54E-02                | 9.05E-02               |
| DOCK1       | dedicator of cytokinesis 1                                            | 1.09                        | 4.3E-04                 | 3.6E-02                | 1.48                        | 9.55E-05                | 6.37E-03               |
| DOCK10      | dedicator of cytokinesis 10                                           | 1.14                        | 1.7E-03                 | 6.4E-02                | 1.79                        | 2.03E-03                | 2.72E-02               |
| DYSF        | dysferlin                                                             | -1.09                       | 7.0E-04                 | 4.1E-02                | -1.10                       | 2.54E-02                | 9.05E-02               |
| EBF3        | early B-cell factor 3                                                 | 1.08                        | 2.9E-04                 | 3.1E-02                | 1.31                        | 2.16E-03                | 2.79E-02               |
| ECM2        | extracellular matrix protein 2, female organ and adipocyte specific   | 1.14                        | 6.9E-04                 | 4.1E-02                | 1.67                        | 1.97E-03                | 2.68E-02               |
| EDNRA       | endothelin receptor type A                                            | 1.15                        | 3.1E-03                 | 8.8E-02                | 1.61                        | 1.80E-04                | 8.62E-03               |
| EDNRB       | endothelin receptor type B                                            | 1.19                        | 4.3E-04                 | 3.6E-02                | 1.88                        | 1.07E-06                | 8.93E-04               |
| ELOF1       | elongation factor 1 homolog (S. cerevisiae)                           | -1.09                       | 3.7E-04                 | 3.5E-02                | -1.19                       | 1.92E-03                | 2.64E-02               |
| ENAM        | enamelin                                                              | -1.23                       | 4.2E-04                 | 3.6E-02                | -1.20                       | 1.67E-02                | 7.47E-02               |
| ENDOD1      | endonuclease domain containing 1                                      | -1.12                       | 1.2E-03                 | 5.4E-02                | -1.17                       | 2.90E-03                | 3.24E-02               |
| ENPP2       | ectonucleotide pyrophosphatase/phosphodiesterase 2                    | 1.27                        | 5.0E-07                 | 1.5E-03                | 1.36                        | 8.60E-04                | 1.80E-02               |
| EPHB1       | EPH receptor B1                                                       | -1.17                       | 9.1E-04                 | 4.6E-02                | -1.21                       | 2.95E-02                | 9.71E-02               |
| F11R        | F11 receptor                                                          | 1.11                        | 5.2E-04                 | 3.8E-02                | 1.31                        | 2.65E-03                | 3.09E-02               |
| F2R         | coagulation factor II (thrombin) receptor                             | 1.14                        | 1.6E-04                 | 2.6E-02                | 1.53                        | 1.14E-05                | 2.59E-03               |
| FAM78A      | family with sequence similarity 78, member A                          | -1.15                       | 3.1E-04                 | 3.2E-02                | -1.30                       | 1.55E-03                | 2.36E-02               |
| FBXW5       | F-box and WD repeat domain containing 5                               | -1.10                       | 2.4E-05                 | 1.1E-02                | -1.29                       | 3.32E-03                | 3.45E-02               |
| FLIPL1      | filamin A interacting protein 1-like                                  | 1.11                        | 1.2E-03                 | 5.5E-02                | 1.26                        | 2.02E-02                | 8.18E-02               |
| FLNC        | filamin C, gamma                                                      | -1.14                       | 9.0E-04                 | 4.6E-02                | -1.20                       | 4.70E-03                | 4.03E-02               |
| FLRT3       | fibronectin leucine rich transmembrane protein 3                      | -1.24                       | 6.3E-04                 | 4.0E-02                | -1.26                       | 1.02E-02                | 5.94E-02               |
| FRMD6       | FERM domain containing 6                                              | 1.12                        | 1.6E-04                 | 2.6E-02                | 1.51                        | 2.15E-03                | 2.79E-02               |
| FXYD6       | FXYD domain containing ion transport regulator 6                      | 1.08                        | 7.4E-04                 | 4.2E-02                | 1.24                        | 1.87E-03                | 2.61E-02               |
| FZD4        | frizzled class receptor 4                                             | 1.13                        | 1.0E-06                 | 2.4E-03                | 1.35                        | 2.13E-06                | 1.16E-03               |
| FZD6        | frizzled class receptor 6                                             | 1.13                        | 8.8E-04                 | 4.6E-02                | 1.58                        | 1.15E-04                | 6.96E-03               |
| GABBR1      | gamma-aminobutyric acid (GABA) B receptor, 1                          | 1.10                        | 3.6E-03                 | 9.5E-02                | 1.30                        | 5.24E-03                | 4.29E-02               |
| GBA2        | glucosidase, beta (bile acid) 2                                       | -1.14                       | 5.0E-04                 | 3.8E-02                | -1.16                       | 1.49E-02                | 7.07E-02               |
| GNAI1       | G Protein Subunit Alpha I1                                            | 1.12                        | 1.9E-03                 | 6.6E-02                | 1.51                        | 3.22E-05                | 4.02E-03               |
| GPR133      | G protein-coupled receptor 133                                        | -1.10                       | 3.8E-04                 | 3.5E-02                | -1.28                       | 2.88E-04                | 1.07E-02               |
| GRIP2       | glutamate receptor interacting protein 2                              | -1.12                       | 1.7E-03                 | 6.3E-02                | -1.41                       | 4.48E-03                | 3.93E-02               |
| GSS         | glutathione synthetase                                                | -1.11                       | 3.9E-05                 | 1.4E-02                | -1.24                       | 9.63E-04                | 1.89E-02               |
| GTZF2H4     | general transcription factor IIH, polypeptide 4, 52kDa                | -1.07                       | 6.2E-04                 | 4.0E-02                | -1.11                       | 1.06E-02                | 6.03E-02               |
| GYS1        | glycogen synthase 1 (muscle)                                          | -1.10                       | 7.0E-04                 | 4.1E-02                | -1.17                       | 2.70E-02                | 9.31E-02               |
| HDAC5       | histone deacetylase 5                                                 | -1.13                       | 2.0E-05                 | 1.1E-02                | -1.24                       | 2.69E-04                | 1.03E-02               |
| HEY1        | hes-related family bHLH transcription factor with YRPW motif 1        | 1.12                        | 1.1E-03                 | 5.3E-02                | 1.26                        | 7.22E-03                | 5.00E-02               |
| HIBCH       | 3-hydroxyisobutyryl-CoA hydrolase                                     | 1.13                        | 1.3E-03                 | 5.7E-02                | 1.23                        | 5.67E-04                | 1.45E-02               |
| HIPK2       | homeodomain interacting protein kinase 2                              | -1.14                       | 1.8E-04                 | 2.6E-02                | -1.32                       | 1.05E-02                | 6.01E-02               |
| HIVEP3      | human immunodeficiency virus type 1 enhancer binding protein 3        | -1.08                       | 2.0E-04                 | 2.7E-02                | -1.15                       | 1.34E-02                | 6.75E-02               |
| HOMER2      | homolog 2 (Drosophila)                                                | -1.14                       | 3.9E-04                 | 3.5E-02                | -1.28                       | 1.52E-02                | 7.14E-02               |
| HSPB7       | heat shock 27kDa protein family, member 7 (cardiovascular)            | -1.21                       | 5.0E-05                 | 1.6E-02                | -1.29                       | 7.10E-04                | 1.62E-02               |
| HSPG2       | heparan sulfate proteoglycan 2                                        | 1.15                        | 4.4E-06                 | 4.8E-03                | 1.38                        | 7.78E-04                | 1.70E-02               |
| HTRA1       | HtrA serine peptidase 1                                               | 1.09                        | 2.2E-03                 | 7.1E-02                | 1.20                        | 1.32E-02                | 6.71E-02               |
| IFI16       | interferon, gamma-inducible protein 16                                | 1.14                        | 3.6E-03                 | 9.4E-02                | 1.45                        | 1.61E-03                | 2.42E-02               |
| IGF1        | insulin-like growth factor 1 (somatomedin C)                          | 1.20                        | 5.5E-04                 | 3.9E-02                | 1.71                        | 6.44E-04                | 1.54E-02               |
| IGF2        | insulin-like growth factor 2 (somatomedin A) /// INS-IGF2 readthrough | 1.27                        | 2.5E-06                 | 3.4E-03                | 1.59                        | 2.50E-04                | 9.98E-03               |
| IGFBP5      | insulin-like growth factor binding protein 5                          | 1.18                        | 9.0E-04                 | 4.6E-02                | 1.19                        | 2.58E-02                | 9.13E-02               |
| IGFBP7      | insulin-like growth factor binding protein 7                          | 1.10                        | 3.2E-03                 | 8.9E-02                | 1.41                        | 1.83E-04                | 8.64E-03               |
| ITGB5       | integrin, beta 5                                                      | 1.06                        | 3.5E-03                 | 9.3E-02                | 1.17                        | 2.97E-03                | 3.28E-02               |
| ITPR1       | inositol 1,4,5-trisphosphate receptor, type 1                         | 1.11                        | 1.7E-03                 | 6.3E-02                | 1.22                        | 7.06E-03                | 4.97E-02               |
| JAM2        | junctional adhesion molecule 2                                        | 1.18                        | 5.1E-05                 | 1.6E-02                | 1.39                        | 1.44E-05                | 2.72E-03               |
| JMJD1C      | jumonji domain containing 1C                                          | 1.09                        | 3.0E-03                 | 8.8E-02                | 1.34                        | 4.80E-03                | 4.07E-02               |
| JPH2        | junctophilin 2                                                        | -1.11                       | 3.4E-04                 | 3.4E-02                | -1.11                       | 2.93E-02                | 9.69E-02               |
| JUND        | jun D proto-oncogene                                                  | -1.12                       | 5.5E-04                 | 3.9E-02                | -1.14                       | 2.36E-02                | 8.75E-02               |
| KCNMA1      | Potassium Calcium-Activated Channel Subfamily M Alpha 1               | -1.13                       | 3.6E-03                 | 9.5E-02                | -1.37                       | 6.47E-04                | 1.54E-02               |
| KDR         | kinase insert domain receptor (a type III receptor tyrosine kinase)   | 1.16                        | 9.7E-04                 | 4.8E-02                | 1.51                        | 2.49E-04                | 9.98E-03               |
| KLHD2C      | kelch domain containing 2                                             | 1.08                        | 2.1E-03                 | 7.1E-02                | 1.07                        | 2.11E-02                | 8.31E-02               |
| LAMA4       | laminin, alpha 4                                                      | 1.18                        | 1.7E-04                 | 2.6E-02                | 1.74                        | 8.65E-06                | 2.23E-03               |
| LAMB1       | laminin, beta 1                                                       | 1.16                        | 4.3E-04                 | 3.6E-02                | 1.68                        | 1.61E-03                | 2.42E-02               |
| LANCL1      | LanC antibiotic synthetase component C-like 1 (bacterial)             | 1.09                        | 7.5E-04                 | 4.3E-02                | 1.15                        | 2.78E-03                | 3.16E-02               |
| LARGE       | like-glycosyltransferase                                              | -1.09                       | 3.2E-04                 | 3.3E-02                | -1.17                       | 2.24E-02                | 8.54E-02               |
| LINC00312   | long intergenic non-protein coding RNA 312                            | -1.22                       | 1.2E-03                 | 5.4E-02                | -1.13                       | 2.57E-02                | 9.11E-02               |
| LOX         | lysyl oxidase                                                         | 1.18                        | 3.0E-03                 | 8.7E-02                | 3.02                        | 5.47E-05                | 5.00E-03               |
| LPIN1       | lipin 1                                                               | 1.11                        | 5.8E-04                 | 4.0E-02                | 1.09                        | 1.26E-02                | 6.57E-02               |
| LRPAP1      | low density lipoprotein receptor-related protein associated protein 1 | -1.06                       | 2.1E-03                 | 7.0E-02                | -1.17                       | 6.41E-04                | 1.54E-02               |
| LRRFIP1     | leucine rich repeat (in FLII) interacting protein 1                   | -1.10                       | 2.6E-04                 | 3.0E-02                | -1.16                       | 2.38E-02                | 8.79E-02               |
| LSM12       | LSM12 homolog (S. cerevisiae)                                         | -1.07                       | 1.1E-03                 | 5.2E-02                | -1.36                       | 3.14E-04                | 1.11E-02               |
| LSMEM2      | leucine-rich single-pass membrane protein 2                           | -1.08                       | 7.4E-04                 | 4.2E-02                | -1.27                       | 2.06E-02                | 8.22E-02               |
| MAPK12      | mitogen-activated protein kinase 12                                   | -1.10                       | 1.2E-03                 | 5.3E-02                | -1.36                       | 5.08E-05                | 4.85E-03               |
|             |                                                                       |                             |                         |                        |                             |                         |                        |
